# Supplementary material for: Photoinduced organocatalyzed controlled radical polymerization feasible over a wide range of wavelengths
Source: Royal Society of Chemistry journal article supplement (doi:10.1039/d1py01444g), 2021-12-15
Supplement: d1py01444g1.pdf [file d1py01444g1.pdf]

## Supporting Information

### **Photoinduced organocatalyzed controlled radical polymerization feasible over a wide range of wavelengths**

Qiuyu Li,<sup>a,†</sup> Zhen Lu,<sup>a,b,†</sup> Hongjie Yang,<sup>a</sup> Jingyu Cai,<sup>a,b</sup> Xiangyu Yin,<sup>a</sup> Yulai Zhao,<sup>a</sup> Longqiang Xiao,<sup>a,b,\*</sup> Linxi Hou<sup>a,c,\*</sup>

<sup>a</sup>Department of Materials-Oriented Chemical Engineering, School of Chemical Engineering, Fuzhou University, No. 2 Xueyuan Road, Fuzhou, 350116, P. R. China

<sup>b</sup>Qingyuan Innovation Laboratory, Quanzhou, 362801, P. R. China

<sup>c</sup>Fujian Key Laboratory of Advanced Manufacturing Technology of Specialty Chemicals, Fuzhou University, No. 2 Xueyuan Road, Fuzhou, 350116, P. R. China

<sup>†</sup>The authors contribute equally to this article.

Corresponding authors: Longqiang Xiao (xiaolq@fzu.edu.cn) and Linxi Hou (lxhou@fzu.edu.cn)

## **Table of Contents**

**Section 1. Materials and Characterizations**

**Section 2. Complete synthetic procedure**

**Section 3. General polymerization procedure**

**Section 4. Supplementary table and figures**

**Section 5. Reference**

## Section 1. Materials and Characterizations

### Materials

Methyl methacrylate (MMA) (> 99.8%), Glycidyl methacrylate (GMA) (> 95.0%), Benzyl methacrylate (BzMA) (> 98.0%), 2-Methoxyethyl methacrylate (MEMA) (> 98.0%) were purchased from Tokyo Chemical Industry (TCI) and purified through a neutral alumina column before been used. Phenyl methacrylate (PhMA) (> 97.0%), Butyl methacrylate (BMA) (> 99.0%), Poly(ethylene glycol) methyl ether methacrylate (PEGMA) ( $M_n = 475$  g/mol), dimethylaminoethyl methacrylate (DMAEMA) (> 98.5%), 2-diethylaminoethyl methacrylate (DEAEMA) (> 98.5%), hydroxypropyl methacrylate (HPMA) (> 97.0%), potassium iodide (KI) (> 99.5%), 2-Iodo-2-methylpropionitrile (CP-I) (> 96.0%), Ethidium bromide (EB) (> 95.0%) were purchased from TCI and used as received. The pigskin was purchased from a local supermarket.

The light sources used in this paper were LED lamps (13 W m<sup>-1</sup>, 15 mW cm<sup>-2</sup>) and near infrared light (9.6 W m<sup>-1</sup>, 11 mW cm<sup>-2</sup>). The wavelength ranges of each light source were shown as follow: red light: 620-750 nm; green light: 520-570 nm; blue light: 450-490 nm; white light: 450-730 nm; near infrared light: 750-850 nm.

### Characterizations

The number average molecular weight ( $M_n$ ) and polydispersity ( $M_w/M_n$ ) of polymer samples were measured by gel permeation

chromatography (GPC). The GPC was operated with THF as the eluent (1.0 mL/min) at 30 °C (both the columns and detector), and equipped with a Waters 717 plus auto sampler, a Waters 1515 isocratic HPLC pump, a Waters 2414 refractive index detector, and Shodex K-805, K-804, and K-802.5 columns in series. The column system was calibrated using a series of poly(methyl methacrylate)s (PMMA)s standards. The monomer conversion can be calculated from the peak area of the samples by  $^1\text{H}$  NMR.<sup>1,2</sup>  $^1\text{H}$  NMR (500 MHz) spectra were recorded on Bruker Advance III. UV-vis adsorption spectra were obtained on an Agilent Cary 7000. X-ray photoelectron spectroscopy (XPS) data was obtained with an ESCALAB 250 VG Scientific electron spectrometer using Al/Mg double anode target. Mass spectra were recorded on Agilent 6224 Accurate Mass TOF LC/MS spectrometer.

## **Section 2. Complete synthetic procedure**

The amphiphilic catalyst, ethidium iodide (EI) was prepared by the bromide-iodine transformation of ethidium bromide with KI. 15 mL  $\text{H}_2\text{O}/\text{CH}_3\text{OH}$  mixture ( $V_{\text{water}}:V_{\text{methanol}} = 1:1$ ) was prepared, and then potassium iodide (KI) was dissolved in the above solvents until saturated. After that, ethidium bromide (EB, 1.5 g, 3.8 mmol) was dispersed in the above solvent.<sup>3</sup> After stirring for 24 hours, the mixture was centrifuged and red solid was obtained. Repeat the above steps for 4 times. Then the

obtained solid was washed with CH<sub>3</sub>OH (20 mL) for 3 times, and dried under vacuum to obtain the target product.

### **Section 3. General polymerization procedure**

#### **The typical process of photoinduced reversible complexation-mediated polymerization**

A typical procedure for reversible complexation-mediated radical polymerization (RCMP): a mixture of monomer, CP-I, EI and solvent was added into a 25 mL Schlenk tube at room temperature. The mixture was irradiated by LED lamp under nitrogen atmosphere with stirring. After a predetermined time, a trace amount of the mixture was taken. The mixture was characterized by <sup>1</sup>H NMR to determine the monomer conversion and diluted by THF to determine the number average molecular weight ( $M_n$ ) and polydispersity ( $M_w/M_n$ ) of the obtained polymer, respectively.

#### **Synthesis of iodine end capped poly(methyl methacrylate) (PMMA-I) as macroinitiator.**

A general procedure for the synthesis of macroinitiator PMMA-I: MMA (8 M), CP-I (80 mM) and EI (20 mM) were added into a 25 mL Schlenk tube and irradiated with LED lamps under nitrogen atmosphere. After 9 h, trace amount of the mixture was collected and then characterized by <sup>1</sup>H NMR to determine the monomer conversion. Other mixture was

diluted by THF, and filtered to remove the insoluble matter, then precipitated in diethyl ether. The macroinitiator PMMA-I was obtained by centrifuge and dried under vacuum at room temperature. A trace amount of the macroinitiator was taken and diluted by THF to determine the number average molecular weight ( $M_n$ ) and polydispersity of the obtained polymer.

### **The typical procedure for the synthesis of block copolymer**

A general procedure for the synthesis of block copolymer: macroinitiator PMMA-I, BzMA and EI were added into a 25 mL Schlenk tube under nitrogen atmosphere. Then irradiate the Schlenk tube with a white LED lamp. At a predetermined time, a trace amount of the mixture was taken. The mixture was characterized by  $^1\text{H}$  NMR to determine the monomer conversion and diluted by THF to determine the number average molecular weight ( $M_n$ ) and polydispersity of the obtained polymer.

## Section 4. Supplementary table and figures

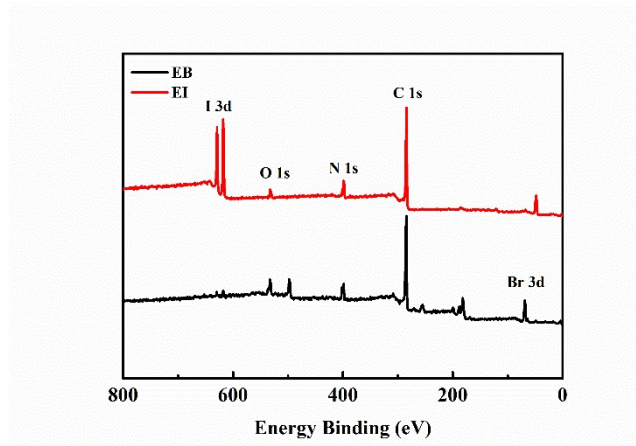

**Figure S1.** The XPS curves of EB (black line) and EI (red line).

**Table S1. Compound Identification Results**

| Ion Species | Ion Formula         | Ion Mass   | Calc Ion Mass |
|-------------|---------------------|------------|---------------|
| Cation      | $C_{21}H_{20}N_3^+$ | 314.16370, | 314.16517,    |
|             |                     | 315.16556, | 315.16853,    |
|             |                     | 316.16910  | 316.17188     |
| Anion       | $I^-$               | 126.90322  | 126.90502     |
| Anion       | $Br^-$              | 78.91709,  | 78.91889,     |
|             |                     | 80.91502   | 80.91684      |

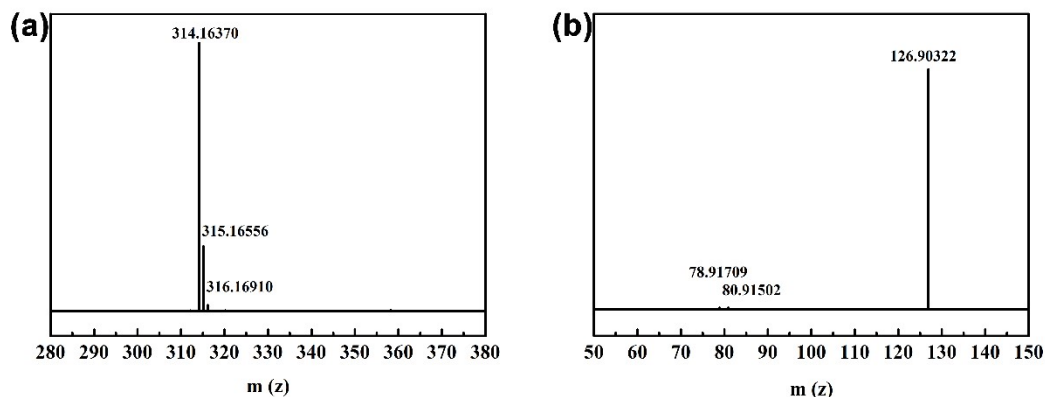

**Figure S2.** MS spectra of ethidium iodide determined by (a) positive mode, and (b) negative mode.

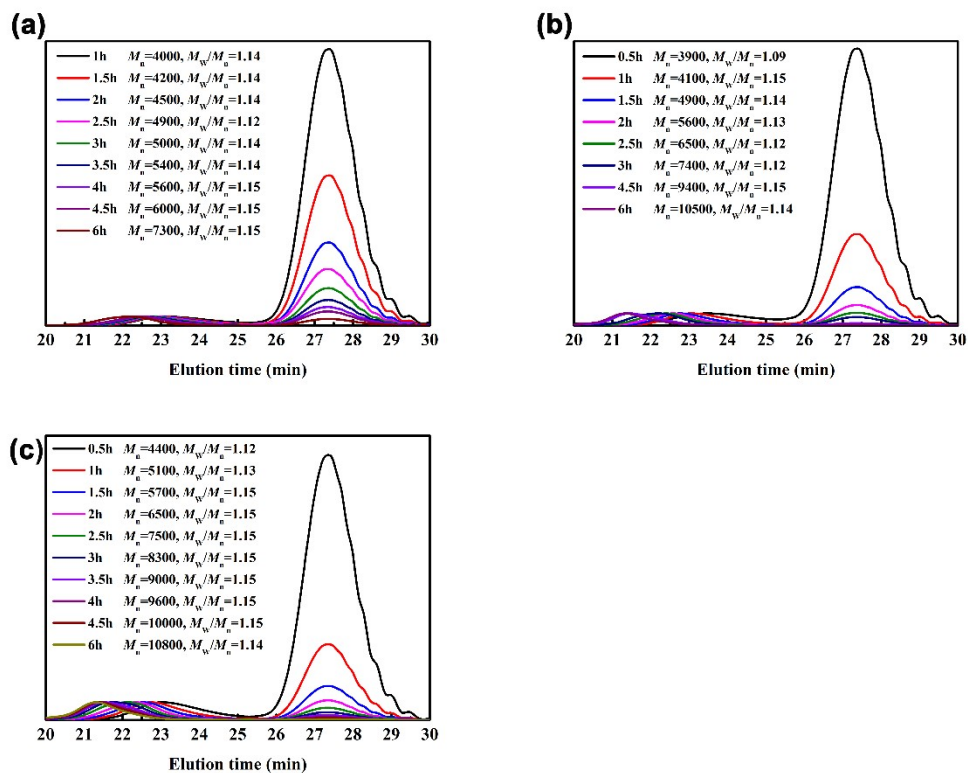

**Figure S3.** GPC traces of polymers obtained by the polymerization of PEGMA/CP-I/EI systems under the irradiation of red LED light:  $[PEGMA]_0 = 0.66$  M;  $[CP-I]_0 = 22$  mM;  $[EI]_0 = 11$  (a), 23 (b), 32 (c) mM in deionized water (50% v/v).



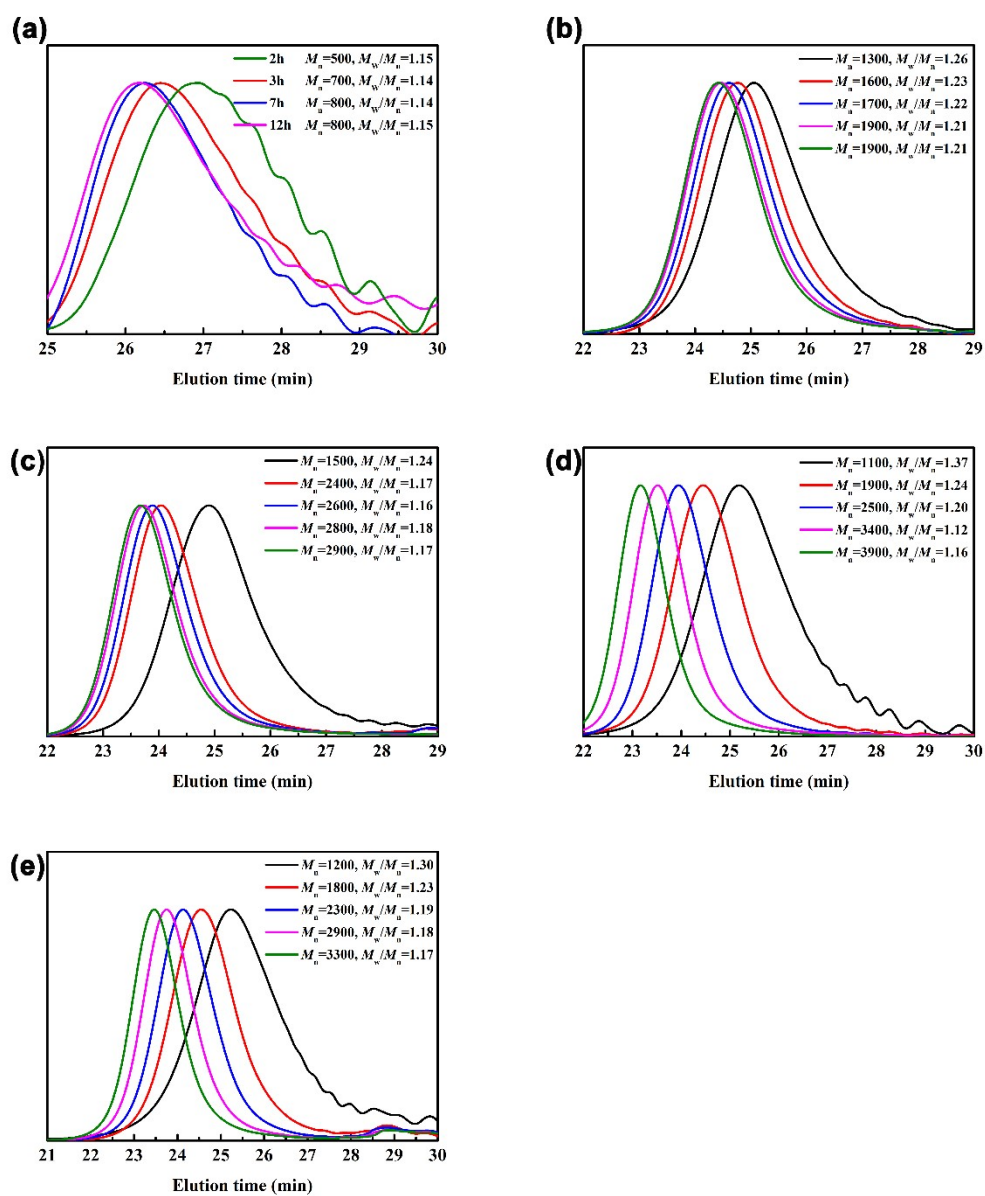

**Figure S4.** GPC traces of polymers obtained by the polymerization of MMA/CP-I/EI systems under the irradiation of white LED light:  $[MMA]_0 = 18.1$  M;  $[CP-I]_0 = 0.181$  mM;  $[EI]_0 = 0$  (a), 11 (b), 23 (c), 45 (d), 91 (e) mM.

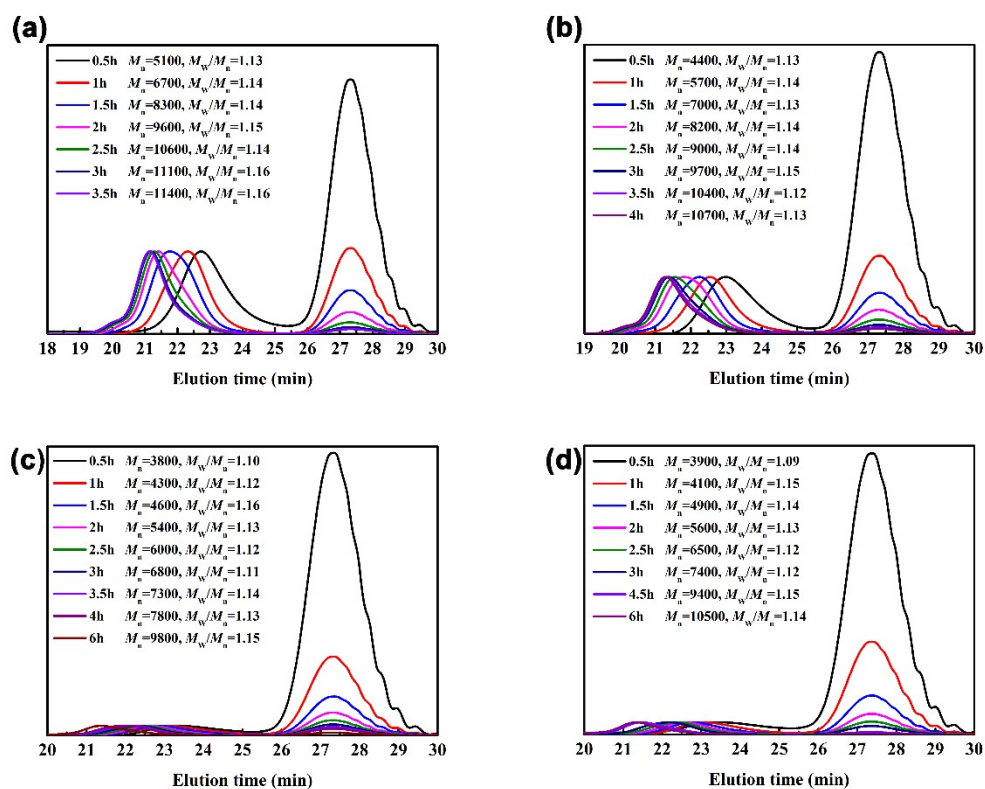

**Figure S5.** GPC traces of polymers obtained by the polymerization of PEGMA under the irradiation of white (a), blue (b), green (c), red (d) LEDs, respectively:  $[\text{PEGMA}]_0/[\text{CP-I}]_0/[\text{EI}]_0 = 24000/800/160$ .

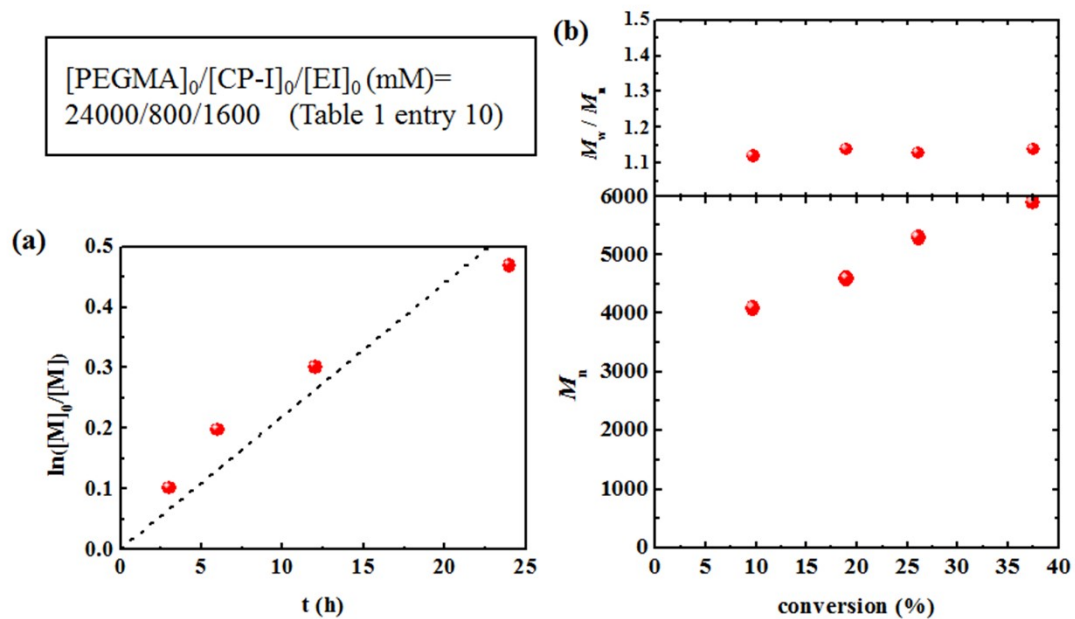

**Figure S6.** Plots of (a)  $\ln([M]_0/[M])$  vs  $t$  and (b)  $M_n$  and  $M_w/M_n$  vs conversion for the polymerization of PEGMA/CP-I/EI systems under the irradiation of near-infrared light: by using the conditions:  $[PEGMA]_0/[CP-I]_0/[EI]_0 = 24000/800/1600$  in deionized water (50% v/v).

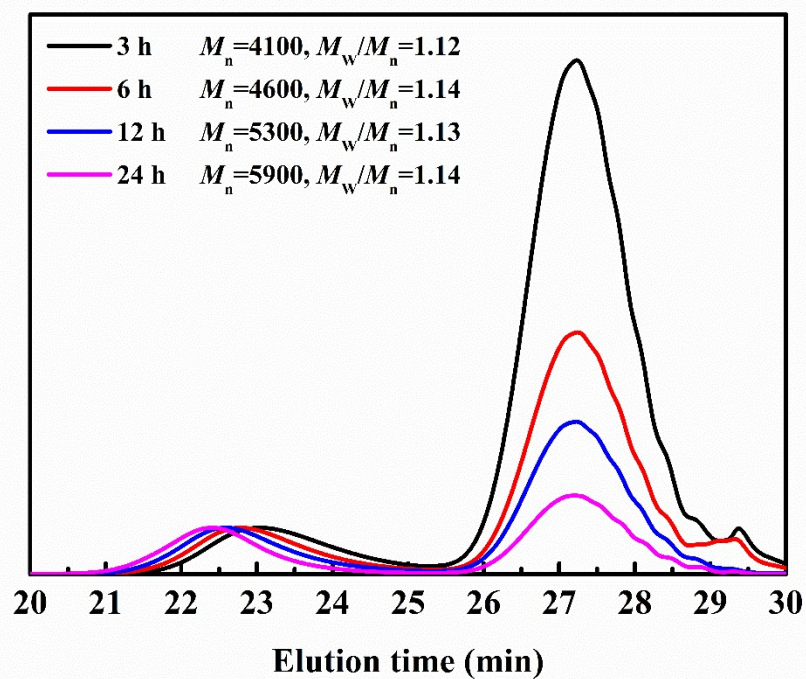

**Figure S7.** The GPC outflow curves of PPEGMA obtained by the polymerization of PEGMA under the irradiation of near-infrared light by using the conditions:  $[\text{PEGMA}]_0/[\text{CP-I}]_0/[\text{EI}]_0 = 24000/800/1600$  in deionized water (50% v/v).

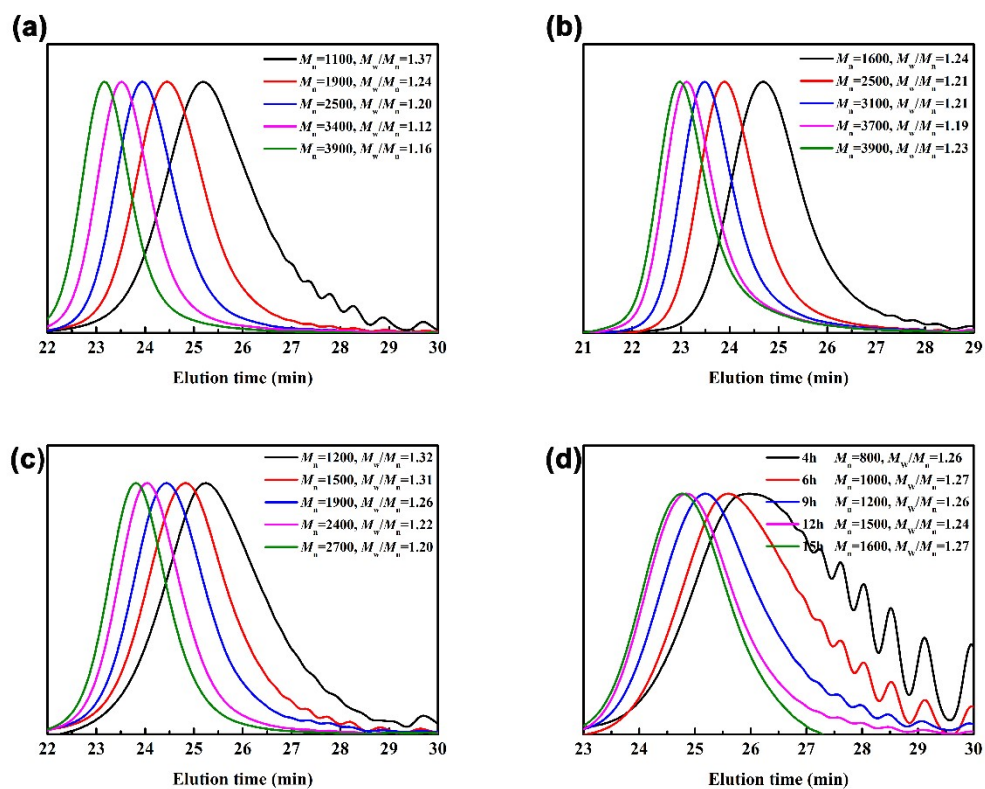

**Figure S8.** GPC traces of polymers obtained by the polymerization of MMA in bulk under the irradiation of white (a), blue (b), green (c), red (d) LEDs, respectively:  $[MMA]_0/[CP-I]_0/[EI]_0 = 24000/240/60$ .

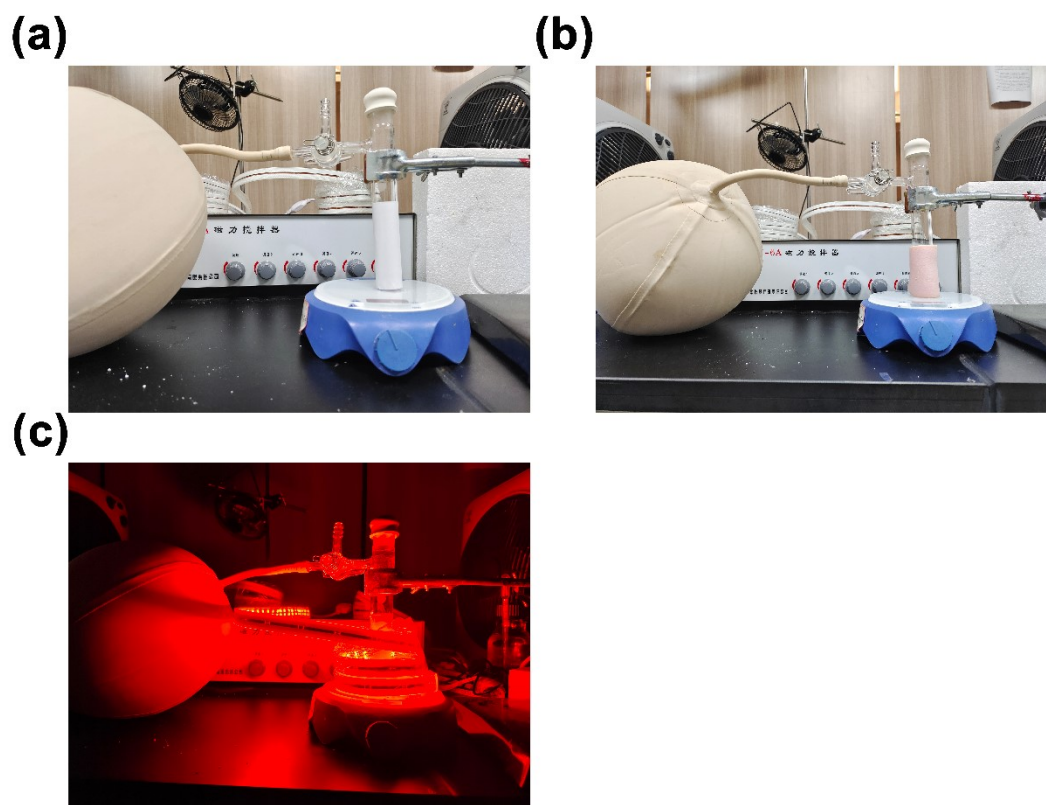

**Figure S9.** Photos of the polymerization settings over different barriers: (a) A4 paper, (b) pigskin, (c) photo of the polymerization setup under red LED light irradiation. (The balloons were filled with nitrogen to provide inert gas)

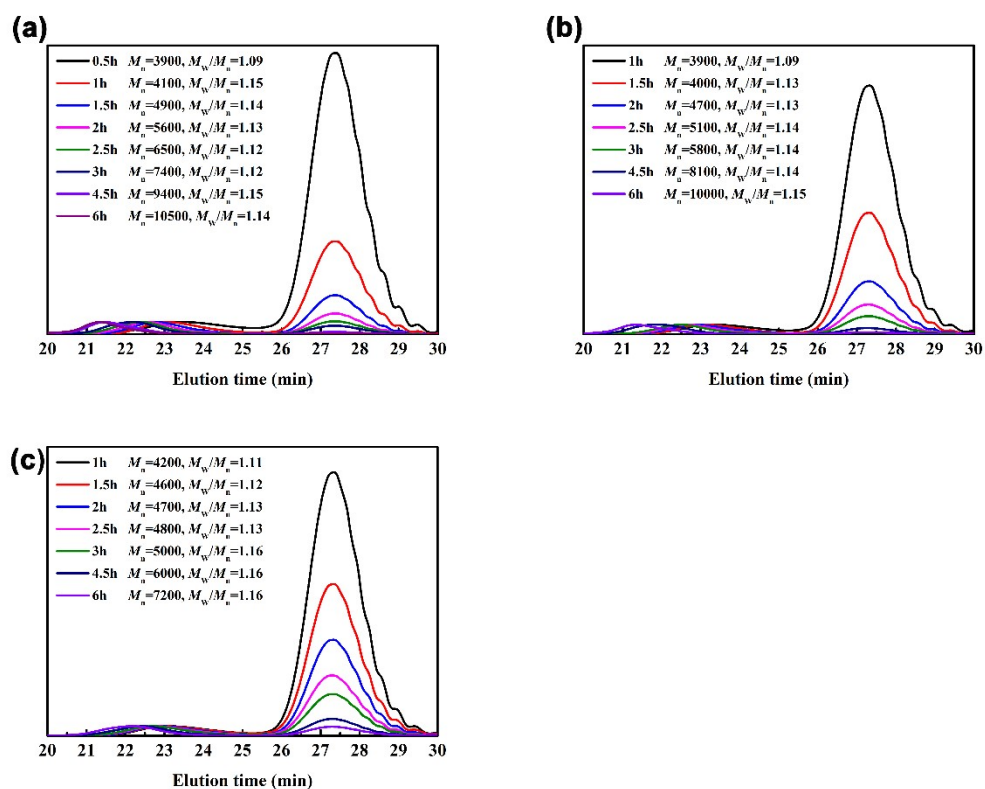

**Figure S10.** GPC traces of polymers obtained by the polymerization of PEGMA under red LED light irradiation over different barriers: (a) none, (b) pigskin, (c) A4 paper, by using the condition of  $[PEGMA]_0/[CP-I]_0/[EI]_0 = 24000/800/160$ .

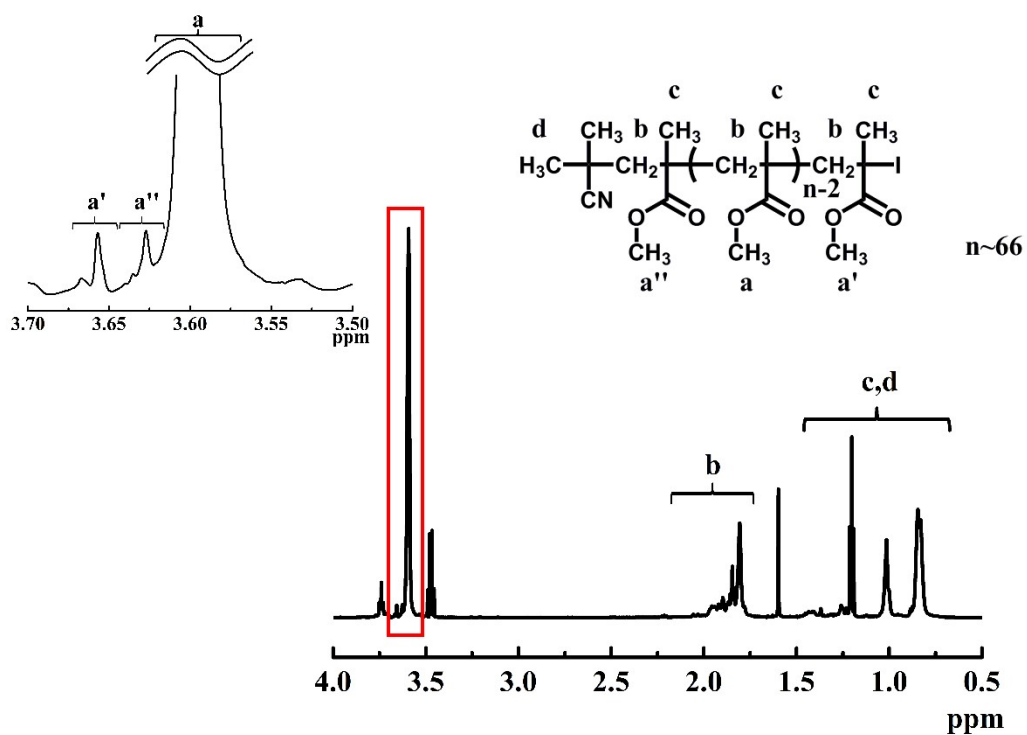

**Figure S11.**  $^1\text{H}$  NMR spectrum ( $\text{CDCl}_3$ ) of PMMA-I ( $M_n = 7800$ ,  $M_w/M_n = 1.07$ ) after 4 hours under the polymerization condition of  $[\text{MMA}]_0/[\text{CP-I}]_0/[\text{EI}]_0 = 24000/60/15$  under the white LED light irradiation.



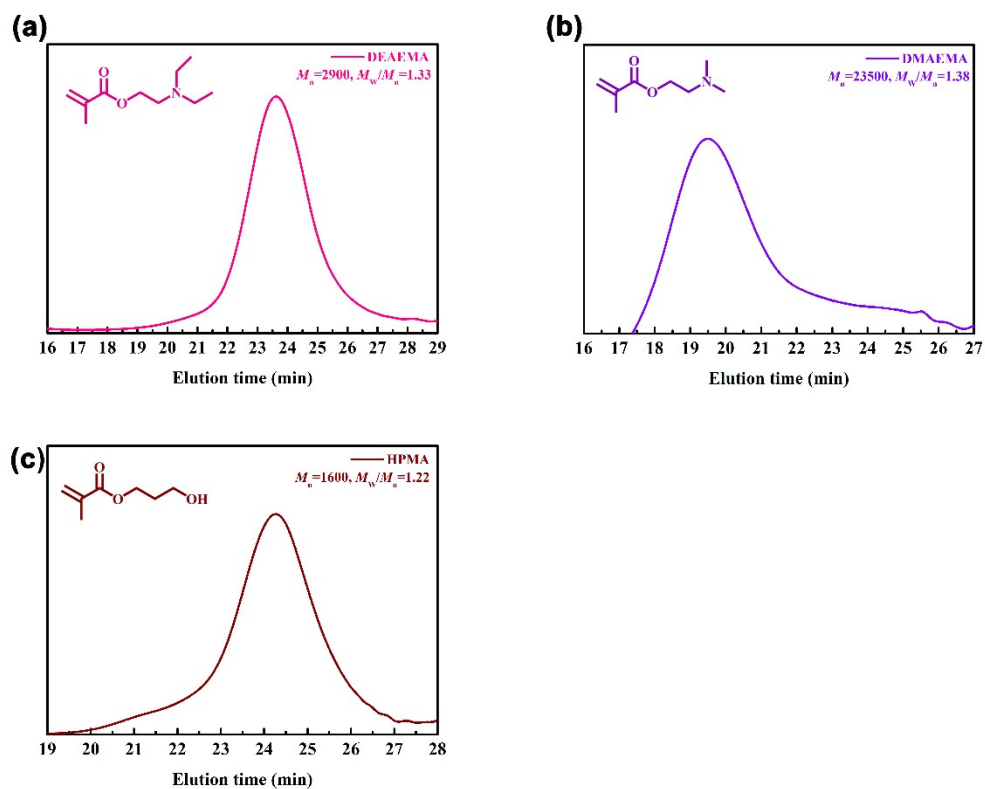

**Figure S12.** GPC traces of polymers obtained from RCMP of different hydrophilic monomers under white LED light irradiation by using condition of  $[M]_0/[CP-I]_0/[EI]_0 = 24000/1200/240$ .  $[M]_0$  means the initial molar ratio of monomers.

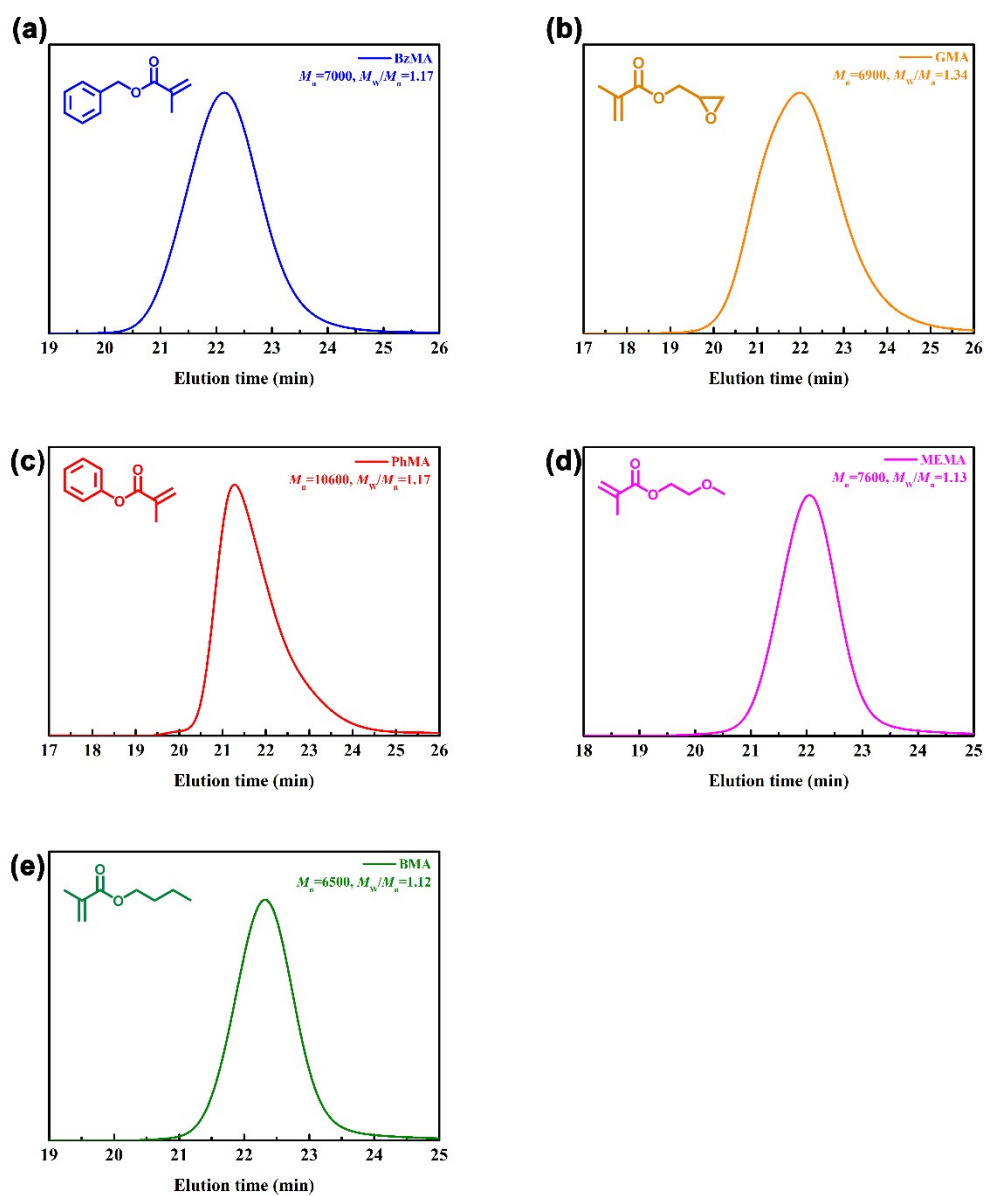

**Figure S13.** GPC traces of polymers obtained from RCMP of different oleophilic monomers under white LED light irradiation by using condition of  $[M]_0/[CP-I]_0/[EI]_0 = 24000/240/60$ .  $[M]_0$  means the initial molar ratio of monomers.

## Section 5. Reference

1. D. Gao, Y. Zhao, J. Cai, L. Hou and L. Xiao, *Chin. J. Polym. Sci.*, 2021, **39**, 1161-1168.
2. Z. Lu, X. Fu, H. Yang, Y. Zhao, L. Xiao and L. Hou, *Polym. Chem.*, 2021, **12**, 183-188.
3. H. Ma, B. Liu, B. Li, L. Zhang, Y. Li, H. Tan, H. Zang and G. Zhu, *J. Am. Chem. Soc.*, 2016, **138**, 5897-5903.
4. N. Petek, H. Brodnik, U. Groselj, J. Svete, F. Pozgan and B. Stefane, *Organ. Lett.*, 2021, **23**, 5294-5298.
